# Supplementary material for: Multigenerational epigenetic inheritance in humans: DNA methylation changes associated with maternal exposure to lead can be transmitted to the grandchildren
Source: PubMed Central journal article supplement (PMC4586440; doi:10.1038/srep14466), 2015-09-29
Supplement: srep14466-s1.pdf [file srep14466-s1.pdf]

**Title Page for Supplementary Information:**

**Title of Manuscript:**

**Multigenerational epigenetic inheritance in humans: DNA methylation changes associated with maternal exposure to lead can be transmitted to the grandchildren**

**Author List:**

Arko Sen<sup>1, 2</sup>, Nicole Heredia<sup>1</sup>, Marie-Claude Senut<sup>1</sup>, Susan Land<sup>3, 4</sup>, Kurt Hollocher<sup>5</sup>, Xiangyi Lu<sup>1</sup>, Mary O. Dereski<sup>6</sup>, and Douglas M. Ruden<sup>1, 3, 4, 7</sup>

1, Institute of Environmental Health Sciences, Wayne State University, Detroit, MI 48201

2, Department of Pharmacology, Wayne State University, Detroit, MI 48201

3, C. S. Mott Centre for Human Growth and Development, Wayne State University, Detroit, MI 48201

4, Department of Obstetrics and Gynecology, Wayne State University, Detroit, MI 48201

5, Union college, 807 Union St, Schenectady, NY 12308

6, Department of Biomedical Sciences, Oakland University William Beaumont School of Medicine, Rochester, MI 48309

7, Corresponding Author: [douglasr@wayne.edu](mailto:douglasr@wayne.edu) (office: 313-577-6688)

## Supplementary Figures

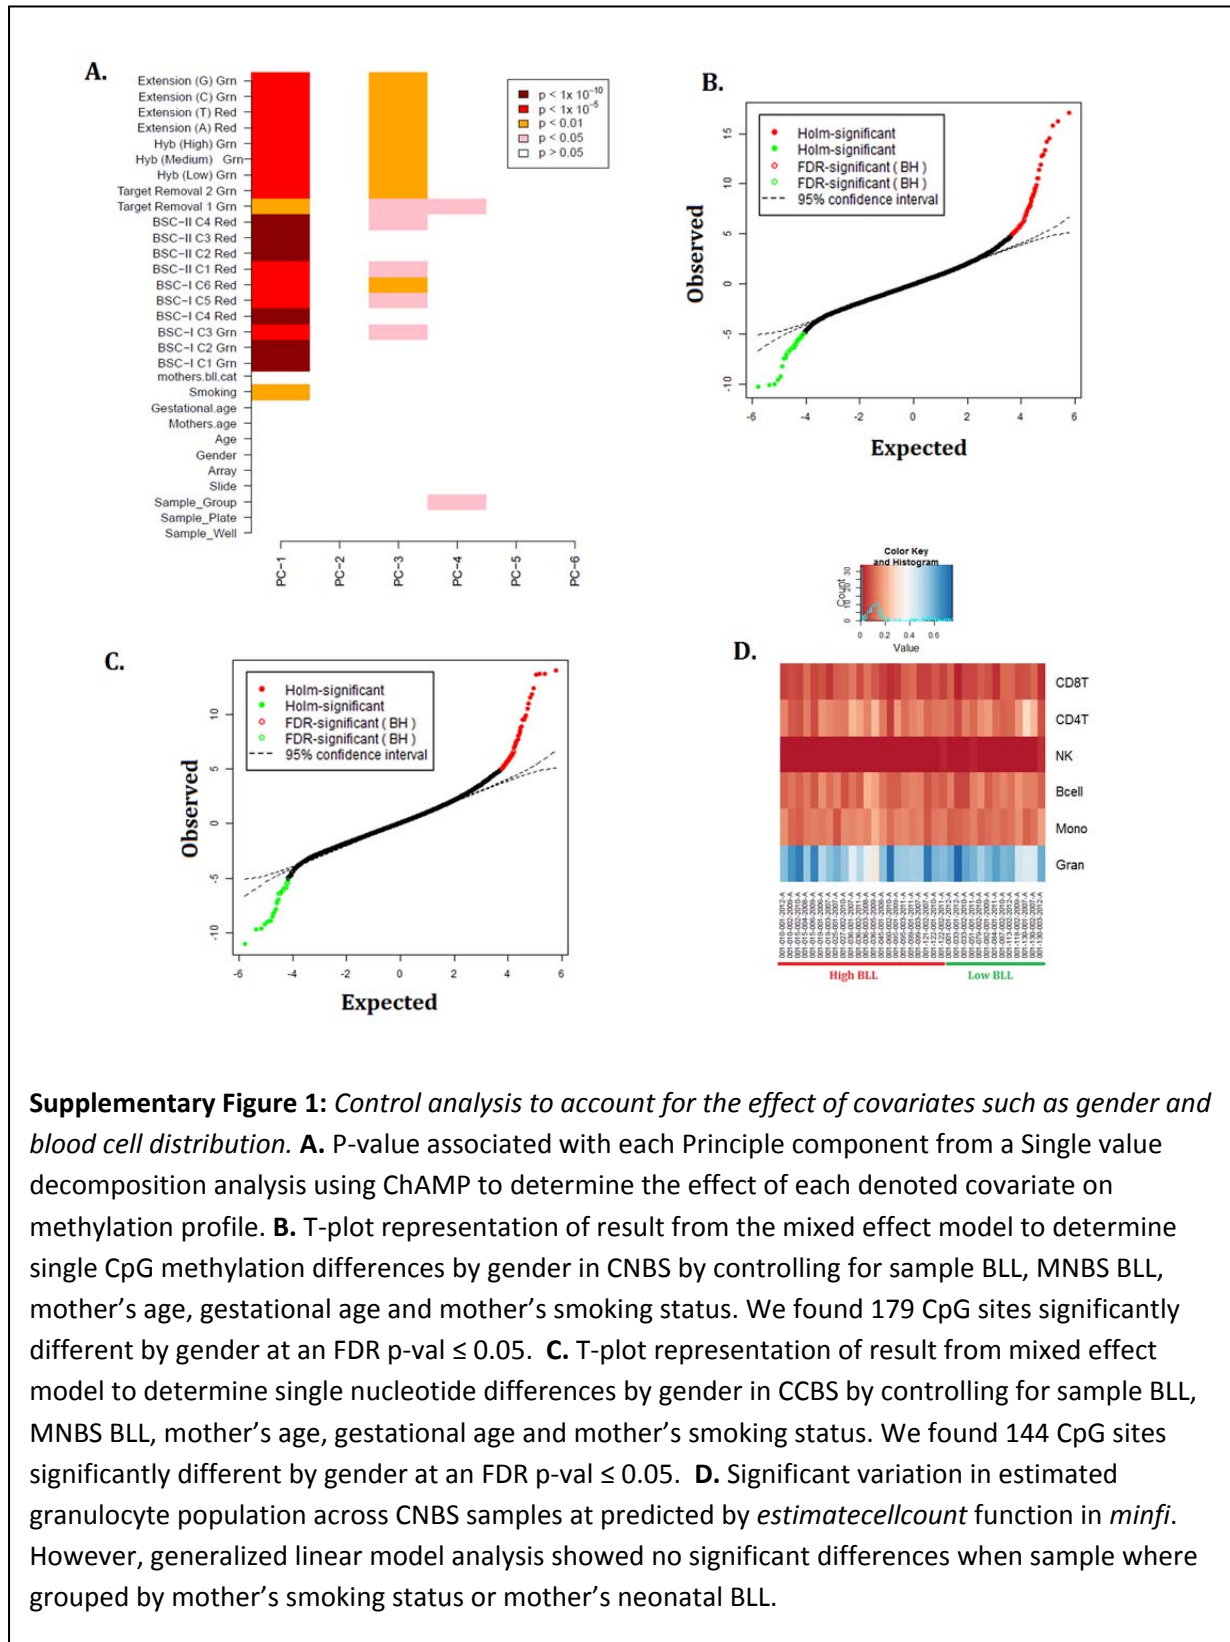

**Supplementary Figure 1:** Control analysis to account for the effect of covariates such as gender and blood cell distribution. **A.** P-value associated with each Principle component from a Single value decomposition analysis using ChAMP to determine the effect of each denoted covariate on methylation profile. **B.** T-plot representation of result from the mixed effect model to determine single CpG methylation differences by gender in CNBS by controlling for sample BLL, MNBS BLL, mother's age, gestational age and mother's smoking status. We found 179 CpG sites significantly different by gender at an FDR p-val  $\leq 0.05$ . **C.** T-plot representation of result from mixed effect model to determine single nucleotide differences by gender in CCBS by controlling for sample BLL, MNBS BLL, mother's age, gestational age and mother's smoking status. We found 144 CpG sites significantly different by gender at an FDR p-val  $\leq 0.05$ . **D.** Significant variation in estimated granulocyte population across CNBS samples at predicted by *estimatecellcount* function in *minfi*. However, generalized linear model analysis showed no significant differences when sample were grouped by mother's smoking status or mother's neonatal BLL.

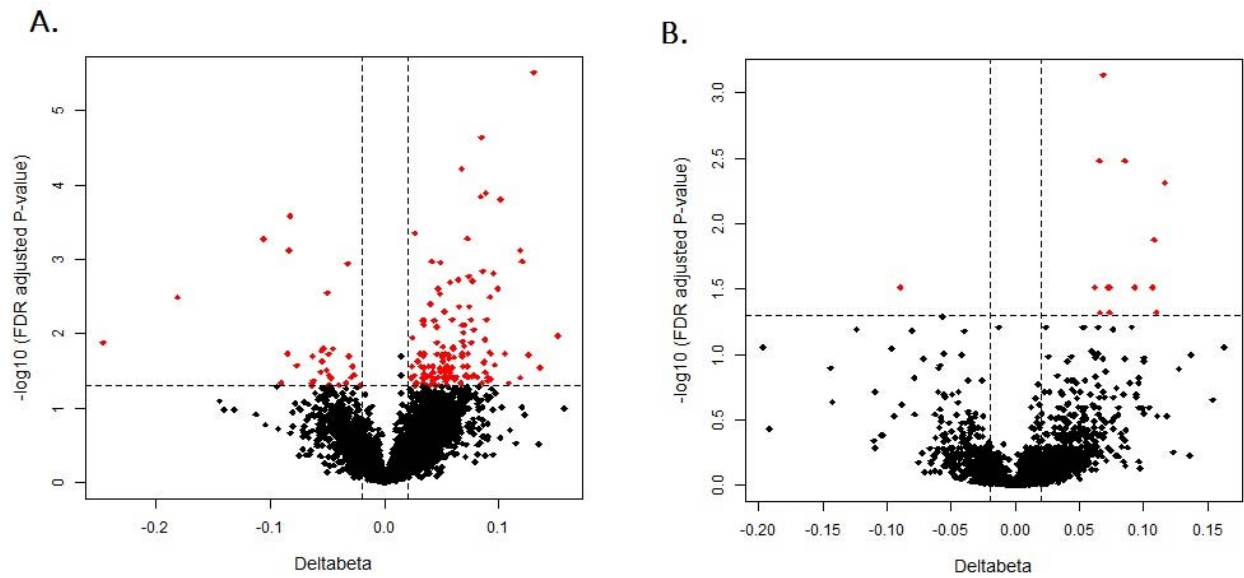

**Supplemental Figure 2:** Differentially methylated sites at a cut-off of 2%. A) A-clustering followed by differential methylation analysis by generalized estimating equation (GEE) revealed 183 CpG clusters mapping to 564 CpG sites differentially methylated in child's neonatal blood spots (CNBS) with high BLL in mother's neonatal blood spot (MNBS) compared to CNBS with low BLL in MNBS. We observed more hyper-methylated CpG clusters (n = 151) compared to hypo-methylated CpG clusters (n= 32) at an exposure effect cut-off of 0.02 (2%) and an FDR p-value  $\leq 0.05$ . B) Differential methylation analysis revealed no association between DNA methylation levels in a child's current blood spot (CCBS) and mother's neonatal BLL (n=14).

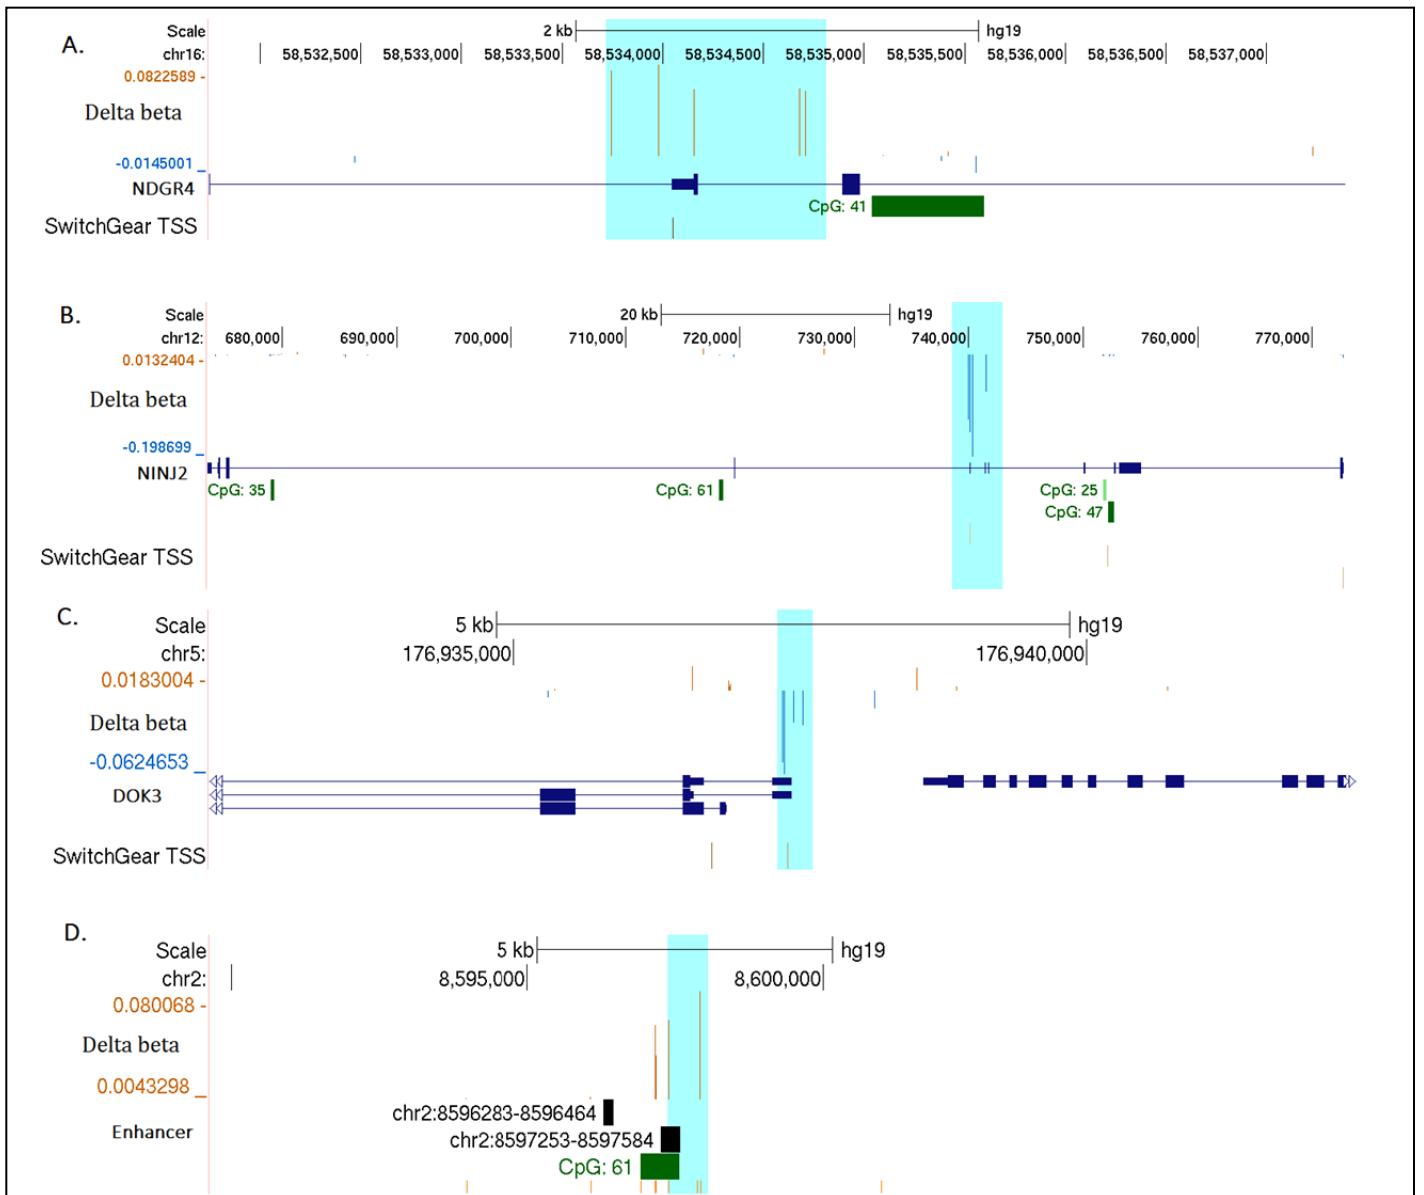

**Supplementary Figure 3:** UCSC genome browser pictures of differentially methylated region detected in CNBS with high BLL in MNBS. The Delta beta or the difference between the mean of the  $\beta$  values for each probe for low BLL samples and high BLL samples were mapped by the chromosomal location of the probes for representative genes A. NDRG4, B. NINJ2, C. DOK3, D. Enhancer identified by Andersson et al, 2014.

### Distribution of deltabeta for significant DMRs

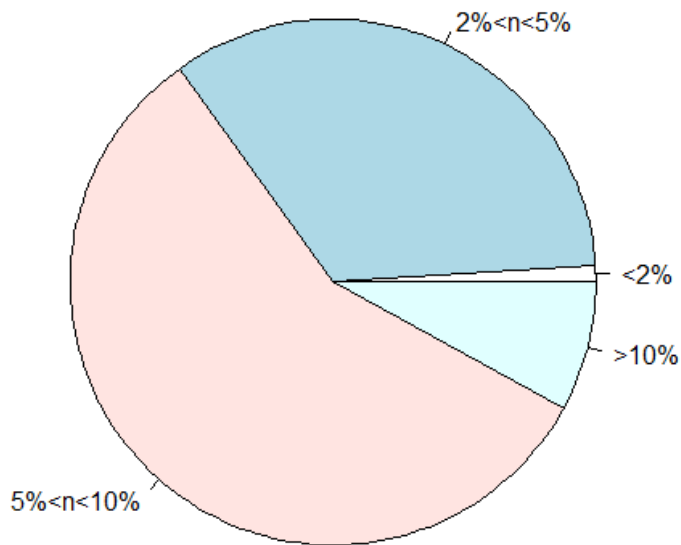

**Supplemental figure 4:** 65% of our significant (FDR p-value  $\leq 0.05$ ) differentially methylated clusters had exposure effects  $\geq$  abs (5%) for CNBS with high BLL in MNBS.

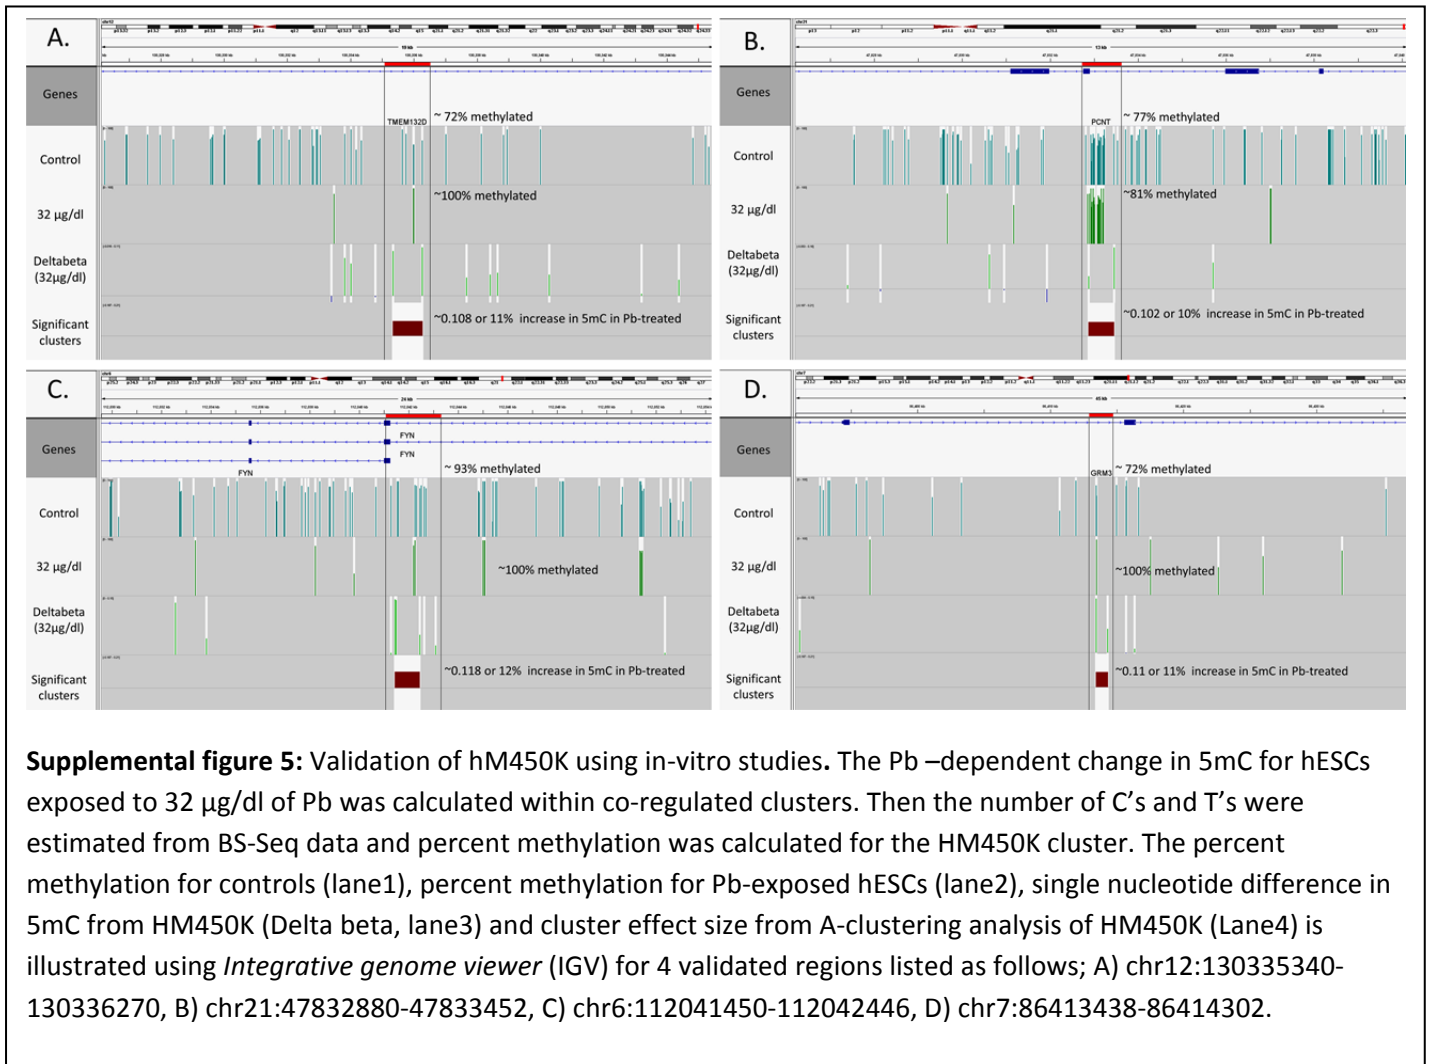

| Sample             | sample bll   | mother's bll | Gender | Age (month) | Mother's age (month) | Gestational age (month) | Smoking |
|--------------------|--------------|--------------|--------|-------------|----------------------|-------------------------|---------|
| 001-027-002-2010-B | 0.19009625   | 6.148736497  | F      | 24          | 264                  | 240                     | No      |
| 001-001-001-2012-B | 0.579901708  | 2.745941529  | M      | 6           | 204                  | 186                     | No      |
| 001-122-001-2010-B | 0.856610711  | 7.29056368   | M      | 24          | 240                  | 216                     | Yes     |
| 001-082-001-2009-B | 0.871991444  | 1.378498216  | M      | 24          | 216                  | 192                     | No      |
| 001-122-002-2011-B | 1.972338713  | 7.29056368   | F      | 12          | 240                  | 228                     | Yes     |
| 001-051-001-2011-B | 2.27245527   | 0.28218839   | M      | 12          | 216                  | 204                     | No      |
| 001-087-002-2010-B | 2.938008435  | 4.252003701  | F      | 24          | 252                  | 228                     | Yes     |
| 001-060-002-2010-B | 3.035195443  | 36.17606133  | F      | 12          | 264                  | 252                     | Yes     |
| 001-130-003-2012-B | 4.378173778  | 3.376888045  | M      | 9           | 264                  | 243                     | No      |
| 001-113-002-2012-B | 4.602492159  | 3.011403372  | F      | 8           | 228                  | 208                     | No      |
| 001-010-001-2012-B | 4.71525216   | 56.64450079  | M      | 5           | 240                  | 235                     | No      |
| 001-036-001-2007-B | 4.735150984  | 11.26302255  | M      | 48          | 264                  | 216                     | Yes     |
| 001-033-001-2012-B | 5.098809195  | 2.244241237  | M      | 3           | 228                  | 225                     | No      |
| 001-036-005-2009-B | 5.809591329  | 11.26302255  | M      | 36          | 264                  | 228                     | Yes     |
| 001-084-001-2011-B | 5.94181757   | 1.768640127  | M      | 12          | 216                  | 204                     | No      |
| 001-015-006-2009-B | 6.248038356  | 6.413477367  | F      | 36          | 264                  | 228                     | No      |
| 001-025-001-2007-B | 6.436692662  | 5.171338965  | M      | 60          | 252                  | 192                     | No      |
| 001-045-001-2008-B | 6.860479927  | 5.987767511  | M      | 36          | 252                  | 216                     | No      |
| 001-095-001-2009-B | 7.04519292   | 5.636077432  | M      | 36          | 228                  | 192                     | No      |
| 001-121-002-2007-B | 7.206834813  | 6.614628519  | F      | 60          | 240                  | 180                     | Yes     |
| 001-099-003-2007-B | 7.430384158  | 7.507768472  | M      | 60          | 228                  | 168                     | No      |
| 001-130-001-2007-B | 7.626344312  | 3.376888045  | M      | 48          | 264                  | 216                     | No      |
| 001-036-002-2011-B | 8.502613523  | 11.26302255  | F      | 12          | 264                  | 252                     | Yes     |
| 001-036-003-2008-B | 9.288905445  | 11.26302255  | M      | 48          | 264                  | 216                     | Yes     |
| 001-015-002-2010-B | 9.640403264  | 6.413477367  | F      | 36          | 264                  | 228                     | No      |
| 001-015-004-2008-B | 9.665637279  | 6.413477367  | F      | 48          | 264                  | 216                     | No      |
| 001-019-001-2006-B | 9.725285685  | 6.999675563  | M      | 60          | 276                  | 216                     | Yes     |
| 001-095-003-2011-B | 10.20218454  | 5.636077432  | M      | 12          | 228                  | 216                     | No      |
| 001-130-002-2007-B | 10.47605773  | 3.376888045  | F      | 48          | 264                  | 216                     | No      |
| 001-099-001-2011-B | 11.04437582  | 7.507768472  | M      | 12          | 228                  | 216                     | No      |
| 001-118-002-2009-B | 11.83912714  | 2.722341717  | F      | 36          | 252                  | 216                     | No      |
| 001-033-002-2010-B | 16.97667656  | 2.244241237  | F      | 24          | 228                  | 204                     | No      |
| 001-019-003-2007-B | 17.22238377  | 6.999675563  | M      | 48          | 276                  | 228                     | Yes     |
| 001-010-002-2009-B | 24.20912991  | 56.64450079  | F      | 24          | 240                  | 216                     | No      |
| 001-079-002-2010-B | 32.80080749  | 2.671777556  | F      | 24          | 252                  | 228                     | No      |
| 001-051-001-2011-A | 1.241657755  | 0.28218839   | M      | NA          | 216                  | 204                     | No      |
| 001-082-001-2009-A | -0.559041588 | 1.378498216  | M      | NA          | 216                  | 192                     | No      |
| 001-084-001-2011-A | 1.627906418  | 1.768640127  | M      | NA          | 216                  | 204                     | No      |
| 001-033-001-2012-A | 2.675718869  | 2.244241237  | M      | NA          | 228                  | 225                     | No      |
| 001-033-002-2010-A | 4.48833828   | 2.244241237  | F      | NA          | 228                  | 204                     | No      |
| 001-079-002-2010-A | 4.078826258  | 2.671777556  | F      | NA          | 252                  | 228                     | No      |
| 001-118-002-2009-A | 1.368164285  | 2.722341717  | F      | NA          | 252                  | 216                     | No      |
| 001-001-001-2012-A | 0.132033982  | 2.745941529  | M      | NA          | 204                  | 186                     | No      |
| 001-113-002-2012-A | 0.526838178  | 3.011403372  | F      | NA          | 228                  | 208                     | No      |
| 001-130-003-2012-A | 1.559798609  | 3.376888045  | M      | NA          | 264                  | 243                     | No      |
| 001-130-001-2007-A | 1.67457733   | 3.376888045  | M      | NA          | 264                  | 216                     | No      |
| 001-130-002-2007-A | 4.367599524  | 3.376888045  | F      | NA          | 264                  | 216                     | No      |
| 001-087-002-2010-A | 1.054781846  | 4.252003701  | F      | NA          | 252                  | 228                     | Yes     |
| 001-025-001-2007-A | 8.759664027  | 5.171338965  | M      | NA          | 252                  | 192                     | No      |
| 001-095-003-2011-A | -0.002739693 | 5.636077432  | M      | NA          | 228                  | 216                     | No      |
| 001-095-001-2009-A | 1.616803451  | 5.636077432  | M      | NA          | 228                  | 192                     | No      |
| 001-045-001-2008-A | -3.885461602 | 5.987767511  | M      | NA          | 252                  | 216                     | No      |
| 001-027-002-2010-A | 0.497807044  | 6.148736497  | F      | NA          | 264                  | 240                     | No      |
| 001-015-002-2010-A | 0.667523822  | 6.413477367  | F      | NA          | 264                  | 228                     | No      |
| 001-015-006-2009-A | 1.383208565  | 6.413477367  | F      | NA          | 264                  | 228                     | No      |
| 001-015-004-2008-A | 1.728121508  | 6.413477367  | F      | NA          | 264                  | 216                     | No      |
| 001-121-002-2007-A | -4.3374629   | 6.614628519  | F      | NA          | 240                  | 180                     | Yes     |
| 001-019-003-2007-A | 1.497650833  | 6.999675563  | M      | NA          | 276                  | 228                     | Yes     |
| 001-019-001-2006-A | 3.819612838  | 6.999675563  | M      | NA          | 276                  | 216                     | Yes     |
| 001-122-001-2010-A | -7.576020476 | 7.29056368   | M      | NA          | 240                  | 216                     | Yes     |
| 001-122-002-2011-A | -0.034270196 | 7.29056368   | F      | NA          | 240                  | 228                     | Yes     |
| 001-099-003-2007-A | 2.376179089  | 7.507768472  | M      | NA          | 228                  | 168                     | No      |
| 001-099-001-2011-A | 9.40974033   | 7.507768472  | M      | NA          | 228                  | 216                     | No      |
| 001-036-003-2008-A | -0.214657358 | 11.26302255  | M      | NA          | 264                  | 216                     | Yes     |
| 001-036-005-2009-A | 0.233450692  | 11.26302255  | M      | NA          | 264                  | 228                     | Yes     |
| 001-036-002-2011-A | 1.617716682  | 11.26302255  | F      | NA          | 264                  | 252                     | Yes     |
| 001-036-001-2007-A | 2.896384326  | 11.26302255  | M      | NA          | 264                  | 216                     | Yes     |
| 001-060-002-2010-A | 2.494466541  | 36.17606133  | F      | NA          | 264                  | 252                     | Yes     |
| 001-010-002-2009-A | 0.587111426  | 56.64450079  | F      | NA          | 240                  | 216                     | No      |
| 001-010-001-2012-A | 1.04007402   | 56.64450079  | M      | NA          | 240                  | 235                     | No      |

**Supplementary Table 1:** Covariate and Blood Lead Level (BLL) information used for DNA methylation analysis for 35 samples. Sample names ending with A (Child's Neonatal blood spots), and with B (Child's current blood spots).

**Supplementary Table 2:** Table showing a list of all genes/CpG clusters which show Pb dependent change in DNA methylation status in CNBS exposed in-utero to high BLL (high BLL MNBS) at exposure effect size cut-off > 0.05 or 5% and FDR ≤ 0.05.

| cluster no. | Effect Size | Standard error | P-value  | CpG sites/Cluster | CpG sites                                                                                                                                                                        | FDR      |
|-------------|-------------|----------------|----------|-------------------|----------------------------------------------------------------------------------------------------------------------------------------------------------------------------------|----------|
| 672         | 0.130861    | 0.02126        | 7.50E-10 | 2                 | ;cg20055237;cg05865340                                                                                                                                                           | 3.09E-06 |
| 598         | 0.084901    | 0.014865       | 1.12E-08 | 2                 | ;cg16877087;cg23080818                                                                                                                                                           | 2.31E-05 |
| 2823        | 0.067546    | 0.012342       | 4.43E-08 | 2                 | ;cg10081469;cg15891218                                                                                                                                                           | 6.08E-05 |
| 3903        | 0.08896     | 0.016827       | 1.24E-07 | 3                 | ;cg17250863;cg12419685;cg19481439                                                                                                                                                | 0.000128 |
| 397         | 0.084224    | 0.01612        | 1.74E-07 | 4                 | ;cg20462561;cg23926439;cg23012917;cg25138412                                                                                                                                     | 0.000143 |
| 536         | 0.102005    | 0.019715       | 2.29E-07 | 4                 | ;cg04850045;cg20265528;cg22878388;cg18192325                                                                                                                                     | 0.000157 |
| 1141        | -0.08219    | 0.016281       | 4.46E-07 | 4                 | ;cg12177334;cg01278291;cg08394278;cg07608052                                                                                                                                     | 0.000262 |
| 696         | 0.02689     | 0.005463       | 8.57E-07 | 8                 | ;cg20850873;cg13047869;cg16606324;cg10729496;cg00166722;cg08888203;cg18621852;cg15117754                                                                                         | 0.000441 |
| 2929        | 0.072807    | 0.01497        | 1.15E-06 | 2                 | ;cg20663376;cg13814747                                                                                                                                                           | 0.000528 |
| 3302        | -0.1054     | 0.021772       | 1.29E-06 | 2                 | ;cg26719625;cg09093656                                                                                                                                                           | 0.000531 |
| 769         | -0.0831     | 0.01753        | 2.13E-06 | 3                 | ;cg04995300;cg17646820;cg23477460                                                                                                                                                | 0.00076  |
| 3746        | 0.11876     | 0.025093       | 2.22E-06 | 2                 | ;cg14942863;cg19556473                                                                                                                                                           | 0.00076  |
| 2080        | 0.041795    | 0.009005       | 3.46E-06 | 2                 | ;cg22867608;cg12397802                                                                                                                                                           | 0.00107  |
| 938         | 0.120837    | 0.026093       | 3.64E-06 | 3                 | ;cg01777861;cg09978860;cg07123701                                                                                                                                                | 0.00107  |
| 664         | 0.048945    | 0.010614       | 4.00E-06 | 3                 | ;cg14266287;cg08773314;cg03560586                                                                                                                                                | 0.001096 |
| 758         | -0.0316     | 0.006885       | 4.45E-06 | 2                 | ;cg16898425;cg11163571                                                                                                                                                           | 0.001144 |
| 1752        | 0.08614     | 0.019022       | 5.94E-06 | 4                 | ;cg09652312;cg24517467;cg09406004;cg25265226                                                                                                                                     | 0.001438 |
| 260         | 0.095582    | 0.021234       | 6.75E-06 | 4                 | ;cg18140268;cg19265480;cg23206461;cg13067553                                                                                                                                     | 0.001544 |
| 1350        | 0.07407     | 0.016574       | 7.85E-06 | 16                | ;cg15713058;cg23942884;cg00063006;cg22859054;cg02269978;cg24639679;cg19628603;cg00797104;cg11060379;cg17352045;cg00892368;cg21685006;cg18942934;cg13493635;cg15076318;cg08873792 | 0.001702 |
| 149         | 0.064743    | 0.014591       | 9.11E-06 | 3                 | ;cg06155303;cg08597839;cg00107241                                                                                                                                                | 0.001874 |
| 1046        | 0.077498    | 0.017545       | 1.00E-05 | 2                 | ;cg18804667;cg05593411                                                                                                                                                           | 0.001961 |
| 3821        | 0.057643    | 0.013099       | 1.08E-05 | 2                 | ;cg25594486;cg00380835                                                                                                                                                           | 0.002022 |
| 91          | 0.047352    | 0.010898       | 1.39E-05 | 2                 | ;cg17158913;cg04149978                                                                                                                                                           | 0.002473 |
| 375         | 0.099198    | 0.02287        | 1.44E-05 | 2                 | ;cg15730491;cg26047066                                                                                                                                                           | 0.002473 |
| 295         | -0.04977    | 0.011573       | 1.71E-05 | 2                 | ;cg22500132;cg22531371                                                                                                                                                           | 0.00281  |
| 2370        | 0.048644    | 0.011364       | 1.86E-05 | 5                 | ;cg25104637;cg26388730;cg24524285;cg23907108;cg15939287                                                                                                                          | 0.00295  |
| 2663        | 0.092634    | 0.021801       | 2.15E-05 | 2                 | ;cg13586425;cg25772418                                                                                                                                                           | 0.003228 |
| 1776        | -0.18049    | 0.042528       | 2.20E-05 | 4                 | ;cg17920646;cg24536782;cg03116837;cg14317384                                                                                                                                     | 0.003228 |
| 2364        | 0.040771    | 0.009733       | 2.80E-05 | 2                 | ;cg17590162;cg04582871                                                                                                                                                           | 0.003979 |
| 865         | 0.074202    | 0.017869       | 3.29E-05 | 2                 | ;cg25607670;cg18025886                                                                                                                                                           | 0.00438  |



|      |          |          |          |   |                                                                    |          |
|------|----------|----------|----------|---|--------------------------------------------------------------------|----------|
| 773  | 0.065321 | 0.015733 | 3.30E-05 | 2 | ;cg00258809;cg25112202                                             | 0.00438  |
| 3398 | 0.053011 | 0.012888 | 3.90E-05 | 4 | ;cg15117739;cg23245942;cg04917446;cg12057127                       | 0.005016 |
| 4072 | 0.059295 | 0.014673 | 5.32E-05 | 2 | ;cg00549798;cg08362785                                             | 0.006501 |
| 261  | 0.075658 | 0.018759 | 5.50E-05 | 2 | ;cg00171578;cg10537450                                             | 0.006501 |
| 1903 | 0.089381 | 0.022168 | 5.53E-05 | 2 | ;cg22258713;cg23193613                                             | 0.006501 |
| 1274 | 0.044145 | 0.010969 | 5.71E-05 | 3 | ;cg24710951;cg08743794;cg26004235                                  | 0.006533 |
| 241  | 0.033259 | 0.008284 | 5.94E-05 | 2 | ;cg10806711;cg16255156                                             | 0.006593 |
| 3002 | 0.034779 | 0.008674 | 6.09E-05 | 6 | ;cg03291024;cg13778201;cg08267442;cg01351822;cg16414568;cg08551047 | 0.006593 |
| 391  | 0.043114 | 0.010783 | 6.38E-05 | 2 | ;cg25734842;cg15033163                                             | 0.006737 |
| 3399 | 0.034554 | 0.008727 | 7.52E-05 | 2 | ;cg23690166;cg26608174                                             | 0.00756  |
| 3354 | 0.070167 | 0.017724 | 7.53E-05 | 2 | ;cg26960939;cg07248223                                             | 0.00756  |
| 192  | 0.068127 | 0.017245 | 7.80E-05 | 2 | ;cg12275060;cg03912703                                             | 0.00764  |
| 1138 | 0.046181 | 0.011748 | 8.46E-05 | 4 | ;cg01287088;cg06847624;cg00642460;cg20095656                       | 0.008101 |
| 2925 | 0.078425 | 0.020093 | 9.50E-05 | 2 | ;cg16276982;cg09214243                                             | 0.008886 |
| 1408 | 0.069139 | 0.01783  | 0.000105 | 3 | ;cg17962638;cg18288532;cg16218241                                  | 0.009643 |
| 2199 | 0.151873 | 0.039475 | 0.000119 | 2 | ;cg23771949;cg15175351                                             | 0.010685 |
| 2118 | 0.024513 | 0.006403 | 0.000129 | 3 | ;cg09321019;cg22591964;cg05545635                                  | 0.01129  |
| 2059 | 0.088209 | 0.023168 | 0.00014  | 2 | ;cg06012872;cg20638675                                             | 0.012044 |
| 426  | 0.068636 | 0.018103 | 0.00015  | 3 | ;cg07726288;cg08121453;cg06362358                                  | 0.012576 |
| 3195 | 0.067909 | 0.01794  | 0.000153 | 4 | ;cg07102001;cg04324917;cg07721872;cg00227665                       | 0.012633 |
| 1630 | 0.046122 | 0.012242 | 0.000165 | 4 | ;cg15134787;cg07496173;cg03313088;cg01989621                       | 0.013101 |
| 3584 | 0.076242 | 0.020257 | 0.000167 | 2 | ;cg25584814;cg08617160                                             | 0.013101 |
| 2507 | -0.24546 | 0.06525  | 0.000169 | 2 | ;cg26654770;cg01201512                                             | 0.013101 |
| 2459 | 0.069781 | 0.018704 | 0.000191 | 2 | ;cg06978117;cg03554573                                             | 0.01455  |
| 2097 | 0.051348 | 0.013808 | 0.0002   | 3 | ;cg27102629;cg04359418;cg14906690                                  | 0.014953 |
| 1628 | 0.060377 | 0.016254 | 0.000203 | 3 | ;cg16491960;cg01104724;cg20897830                                  | 0.014953 |
| 2229 | 0.060546 | 0.016377 | 0.000218 | 4 | ;cg12047941;cg25050332;cg08000731;cg15013527                       | 0.01576  |
| 1284 | -0.05299 | 0.014355 | 0.000223 | 2 | ;cg20112500;cg11934771                                             | 0.015811 |
| 1051 | -0.04477 | 0.012154 | 0.00023  | 4 | ;cg06998965;cg17019292;cg05901765;cg06418871                       | 0.016053 |
| 1520 | -0.0549  | 0.014971 | 0.000245 | 3 | ;cg02827175;cg16993108;cg01952989                                  | 0.016829 |
| 1166 | 0.092011 | 0.025198 | 0.000261 | 2 | ;cg18256205;cg10430077                                             | 0.017587 |
| 2177 | 0.068544 | 0.018842 | 0.000275 | 2 | ;cg09953287;cg11320749                                             | 0.018197 |
| 1946 | 0.035074 | 0.00965  | 0.000279 | 2 | ;cg08578641;cg23579062                                             | 0.018197 |
| 2135 | 0.031411 | 0.008674 | 0.000293 | 3 | ;cg21378403;cg14585415;cg05593775                                  | 0.018497 |
| 733  | 0.073311 | 0.020261 | 0.000297 | 6 | ;cg19875656;cg02834909;cg19668234;cg17460445;cg01967580;cg05727070 | 0.018497 |
| 2444 | 0.093399 | 0.025839 | 0.000301 | 3 | ;cg09610772;cg18725375;cg15146462                                  | 0.018497 |
| 857  | -0.08438 | 0.023383 | 0.000308 | 2 | ;cg06305891;cg10959668                                             | 0.018497 |

|      |          |          |          |   |                                                                                          |          |
|------|----------|----------|----------|---|------------------------------------------------------------------------------------------|----------|
| 4091 | 0.105677 | 0.029286 | 0.000308 | 2 | ;cg12301347;cg15236483                                                                   | 0.018497 |
| 3534 | 0.053224 | 0.014757 | 0.00031  | 2 | ;cg12327405;cg06595595                                                                   | 0.018497 |
| 1516 | 0.053157 | 0.014763 | 0.000317 | 2 | ;cg26580761;cg09367467                                                                   | 0.018657 |
| 1737 | -0.04829 | 0.013452 | 0.000331 | 3 | ;cg02711872;cg20142972;cg14711997                                                        | 0.018837 |
| 2611 | 0.046313 | 0.012907 | 0.000333 | 3 | ;cg14573817;cg04686545;cg10082647                                                        | 0.018837 |
| 77   | 0.050468 | 0.014068 | 0.000334 | 2 | ;cg12258811;cg14204433                                                                   | 0.018837 |
| 2676 | 0.056208 | 0.01572  | 0.000349 | 4 | ;cg07775468;cg15962965;cg06128161;cg01577029                                             | 0.019233 |
| 3735 | 0.052361 | 0.014662 | 0.000355 | 6 | ;cg06710596;cg15729137;cg25681177;cg25498045;cg01443452;cg15426035                       | 0.019233 |
| 645  | 0.050609 | 0.01418  | 0.000358 | 2 | ;cg17009069;cg02231590                                                                   | 0.019233 |
| 3721 | 0.126307 | 0.035401 | 0.00036  | 3 | ;cg04546413;cg12756686;cg03161606                                                        | 0.019233 |
| 3647 | -0.06261 | 0.017613 | 0.000378 | 2 | ;cg02346997;cg22322184                                                                   | 0.019957 |
| 823  | 0.068237 | 0.019246 | 0.000392 | 2 | ;cg19027710;cg21597025                                                                   | 0.020036 |
| 1808 | 0.034339 | 0.00969  | 0.000394 | 4 | ;cg02601352;cg04302570;cg12131827;cg26846409                                             | 0.020036 |
| 590  | -0.03049 | 0.008605 | 0.000394 | 2 | ;cg21303039;cg00133811                                                                   | 0.020036 |
| 3138 | 0.015008 | 0.00424  | 0.000401 | 6 | ;cg06877200;cg04436255;cg09137696;cg18438944;cg02263813;cg00425710                       | 0.020138 |
| 861  | 0.061115 | 0.017308 | 0.000414 | 2 | ;cg05542785;cg11867616                                                                   | 0.020534 |
| 471  | 0.051111 | 0.014507 | 0.000426 | 2 | ;cg15423357;cg01884057                                                                   | 0.020886 |
| 2469 | 0.056517 | 0.01612  | 0.000455 | 2 | ;cg26706187;cg04475687                                                                   | 0.022022 |
| 1398 | -0.05394 | 0.015475 | 0.000492 | 2 | ;cg09861824;cg04911669                                                                   | 0.023527 |
| 1450 | 0.029408 | 0.008449 | 0.0005   | 2 | ;cg00788177;cg21583723                                                                   | 0.023587 |
| 1480 | 0.087587 | 0.025185 | 0.000506 | 2 | ;cg21205282;cg22883453                                                                   | 0.023587 |
| 2675 | 0.051402 | 0.01479  | 0.00051  | 2 | ;cg22977246;cg09698465                                                                   | 0.023587 |
| 1527 | 0.087048 | 0.025117 | 0.000529 | 2 | ;cg19346786;cg15247329                                                                   | 0.024186 |
| 3588 | 0.096623 | 0.028073 | 0.000578 | 2 | ;cg06595479;cg21450784                                                                   | 0.02613  |
| 2285 | -0.07644 | 0.022276 | 0.0006   | 3 | ;cg06005892;cg25627263;cg10803034                                                        | 0.026848 |
| 3658 | 0.024378 | 0.007123 | 0.00062  | 2 | ;cg18072388;cg00827581                                                                   | 0.027445 |
| 1229 | 0.072233 | 0.021157 | 0.00064  | 8 | ;cg16731266;cg07017437;cg27535677;cg22497095;cg26865747;cg20851828;cg14654363;cg00990380 | 0.027589 |
| 3405 | 0.054952 | 0.016123 | 0.000653 | 2 | ;cg24992471;cg17129388                                                                   | 0.027589 |
| 434  | 0.054306 | 0.015945 | 0.00066  | 4 | ;cg05422049;cg05854217;cg10522607;cg03550129                                             | 0.027589 |
| 2872 | 0.072981 | 0.021435 | 0.000662 | 4 | ;cg24127506;cg23012310;cg23429749;cg15444358                                             | 0.027589 |
| 2254 | 0.038579 | 0.011342 | 0.00067  | 2 | ;cg02376282;cg08373904                                                                   | 0.027589 |
| 1139 | 0.031933 | 0.009389 | 0.000671 | 3 | ;cg07292251;cg24185628;cg12477903                                                        | 0.027589 |
| 1181 | 0.042267 | 0.012433 | 0.000675 | 2 | ;cg10091752;cg13318241                                                                   | 0.027589 |
| 605  | 0.068754 | 0.020235 | 0.000679 | 3 | ;cg15602054;cg17598339;cg01268571                                                        | 0.027589 |
| 2256 | -0.02776 | 0.008174 | 0.000684 | 2 | ;cg26241460;cg10900641                                                                   | 0.027589 |
| 2152 | 0.048729 | 0.014394 | 0.000711 | 2 | ;cg20925954;cg06110816                                                                   | 0.028409 |
| 3508 | 0.05967  | 0.017644 | 0.00072  | 2 | ;cg01763666;cg18209359                                                                   | 0.028498 |

|      |          |          |          |   |                                                                                                     |          |
|------|----------|----------|----------|---|-----------------------------------------------------------------------------------------------------|----------|
| 3147 | 0.136423 | 0.040379 | 0.000729 | 5 | ;cg05333442;cg27113419;cg05725404;cg00758881;cg04484415                                             | 0.028562 |
| 1730 | 0.034565 | 0.010239 | 0.000736 | 2 | ;cg11060441;cg02906407                                                                              | 0.028585 |
| 2470 | 0.048935 | 0.014551 | 0.000771 | 3 | ;cg27362048;cg09044186;cg25454270                                                                   | 0.029449 |
| 470  | 0.053044 | 0.015776 | 0.000773 | 3 | ;cg01343041;cg18587476;cg17277199                                                                   | 0.029449 |
| 743  | 0.055091 | 0.016473 | 0.000825 | 4 | ;cg02222844;cg08640901;cg15142694;cg09397359                                                        | 0.030802 |
| 197  | -0.05032 | 0.015054 | 0.000829 | 2 | ;cg07150145;cg02291556                                                                              | 0.030802 |
| 1636 | 0.056188 | 0.016811 | 0.000831 | 5 | ;cg08964643;cg18313661;cg21733531;cg17662941;cg26105076                                             | 0.030802 |
| 3285 | 0.05263  | 0.01584  | 0.000892 | 2 | ;cg04157161;cg12504247                                                                              | 0.032622 |
| 3601 | -0.0554  | 0.016687 | 0.0009   | 4 | ;cg11683663;cg02487452;cg08223924;cg19628469                                                        | 0.032622 |
| 3779 | 0.049579 | 0.014938 | 0.000904 | 3 | ;cg19463256;cg19747604;cg17375267                                                                   | 0.032622 |
| 1620 | 0.08858  | 0.026728 | 0.000919 | 2 | ;cg21540359;cg03689146                                                                              | 0.032768 |
| 4104 | 0.042809 | 0.012925 | 0.000926 | 3 | ;cg12961733;cg07774777;cg18232772                                                                   | 0.032768 |
| 2752 | 0.05751  | 0.017372 | 0.000931 | 5 | ;cg05912299;cg14972141;cg16665310;cg20066226;cg13752184                                             | 0.032768 |
| 3558 | 0.034936 | 0.0106   | 0.000982 | 3 | ;cg16004501;cg19533231;cg16439118                                                                   | 0.034092 |
| 3533 | 0.04132  | 0.012542 | 0.000986 | 2 | ;cg15648792;cg05331731                                                                              | 0.034092 |
| 3770 | -0.02607 | 0.007952 | 0.001044 | 3 | ;cg17502434;cg02360514;cg00314427                                                                   | 0.035793 |
| 3505 | -0.0481  | 0.014715 | 0.00108  | 2 | ;cg02280226;cg06483978                                                                              | 0.036309 |
| 3303 | 0.078214 | 0.023938 | 0.001085 | 5 | ;cg04306489;cg14078639;cg03049249;cg04316233;cg02879122                                             | 0.036309 |
| 1850 | 0.071468 | 0.021881 | 0.00109  | 2 | ;cg04889069;cg08415582                                                                              | 0.036309 |
| 222  | 0.014901 | 0.004564 | 0.001094 | 2 | ;cg18116902;cg26347197                                                                              | 0.036309 |
| 3102 | 0.025928 | 0.007956 | 0.001119 | 3 | ;cg05433111;cg01758575;cg14102807                                                                   | 0.036833 |
| 2990 | 0.039817 | 0.012238 | 0.00114  | 4 | ;cg27045999;cg18837035;cg18028999;cg09236163                                                        | 0.037123 |
| 1174 | 0.070945 | 0.021815 | 0.001145 | 2 | ;cg07515565;cg27095915                                                                              | 0.037123 |
| 2326 | 0.054081 | 0.016654 | 0.001165 | 2 | ;cg07298299;cg05265359                                                                              | 0.037453 |
| 2327 | 0.051387 | 0.015875 | 0.001208 | 2 | ;cg20068058;cg22902089                                                                              | 0.038006 |
| 3060 | 0.076417 | 0.023631 | 0.001222 | 8 | ;cg18345369;cg00699901;cg21452411;cg27620871;cg02256969;cg19328294;cg05895034;cg09745688            | 0.038006 |
| 2827 | 0.081532 | 0.025235 | 0.001234 | 3 | ;cg23092040;cg19641841;cg22789982                                                                   | 0.038006 |
| 1944 | 0.046752 | 0.014479 | 0.001242 | 2 | ;cg11993322;cg13811417                                                                              | 0.038006 |
| 651  | 0.063164 | 0.019572 | 0.00125  | 4 | ;cg24767131;cg25560398;cg17204652;cg09490371                                                        | 0.038006 |
| 1629 | 0.0739   | 0.022901 | 0.001252 | 9 | ;cg03829739;cg03122674;cg24398379;cg13763098;cg26262573;cg17328716;cg20115597;cg27550060;cg01922095 | 0.038006 |
| 3088 | 0.058854 | 0.018244 | 0.001255 | 3 | ;cg03014241;cg10784813;cg04004558                                                                   | 0.038006 |
| 3688 | 0.054976 | 0.017048 | 0.001261 | 2 | ;cg18473733;cg02668248                                                                              | 0.038006 |
| 2842 | 0.037138 | 0.011152 | 0.001265 | 2 | ;cg13497903;cg08108868                                                                              | 0.038006 |
| 3132 | 0.090414 | 0.028118 | 0.001302 | 5 | ;cg02382016;cg08615070;cg08681685;cg10144400;cg04506728                                             | 0.038631 |
| 1499 | -0.02866 | 0.008919 | 0.001314 | 3 | ;cg13477101;cg27454412;cg07217954                                                                   | 0.038631 |

|      |          |          |          |    |                                                                                                                |          |
|------|----------|----------|----------|----|----------------------------------------------------------------------------------------------------------------|----------|
| 126  | 0.06081  | 0.018935 | 0.00132  | 2  | ;cg01519464;cg25140783                                                                                         | 0.038631 |
| 730  | 0.072601 | 0.022645 | 0.001346 | 2  | ;cg04459086;cg17683948                                                                                         | 0.038631 |
| 384  | 0.061995 | 0.019338 | 0.001347 | 10 | ;cg21436055;cg22344745;cg15594585;cg20011248;cg18947553;cg27056132;cg02736395;cg05053440;cg14789818;cg20699586 | 0.038631 |
| 2765 | 0.118944 | 0.037106 | 0.001348 | 2  | ;cg00557959;cg15756319                                                                                         | 0.038631 |
| 107  | 0.052246 | 0.016302 | 0.001352 | 2  | ;cg06662140;cg23281527                                                                                         | 0.038631 |
| 361  | 0.056928 | 0.017774 | 0.001361 | 3  | ;cg06949439;cg01442843;cg02035751                                                                              | 0.038631 |
| 2756 | -0.04603 | 0.014405 | 0.001395 | 3  | ;cg14677983;cg08400494;cg12423658                                                                              | 0.039333 |
| 1736 | 0.033125 | 0.010385 | 0.001424 | 5  | ;cg01559770;cg21737698;cg11857646;cg17402325;cg05998486                                                        | 0.03941  |
| 2066 | 0.034876 | 0.010934 | 0.001425 | 2  | ;cg27519330;cg02616604                                                                                         | 0.03941  |
| 1029 | 0.023365 | 0.007327 | 0.001429 | 3  | ;cg15758008;cg25592564;cg05999195                                                                              | 0.03941  |
| 3105 | 0.053498 | 0.016785 | 0.001436 | 2  | ;cg27202236;cg05645661                                                                                         | 0.03941  |
| 3514 | 0.043663 | 0.013725 | 0.001466 | 5  | ;cg02473123;cg19914554;cg20186396;cg11294761;cg25662857                                                        | 0.039958 |
| 896  | 0.054547 | 0.017192 | 0.00151  | 2  | ;cg10635092;cg13688770                                                                                         | 0.040886 |
| 3546 | 0.061842 | 0.019511 | 0.001526 | 2  | ;cg21235532;cg07669403                                                                                         | 0.040903 |
| 1482 | 0.09322  | 0.029417 | 0.00153  | 2  | ;cg19406113;cg16590582                                                                                         | 0.040903 |
| 1077 | 0.042854 | 0.01357  | 0.001589 | 2  | ;cg15574301;cg20385216                                                                                         | 0.042185 |
| 451  | 0.090329 | 0.028656 | 0.001621 | 2  | ;cg09590377;cg21917740                                                                                         | 0.04276  |
| 3167 | -0.0616  | 0.019553 | 0.001631 | 3  | ;cg03991512;cg07320140;cg09899215                                                                              | 0.042763 |
| 395  | 0.053605 | 0.017056 | 0.001673 | 2  | ;cg27524192;cg19631585                                                                                         | 0.043593 |
| 1185 | 0.085331 | 0.02725  | 0.00174  | 2  | ;cg24920126;cg10563109                                                                                         | 0.045037 |
| 1162 | 0.028331 | 0.009057 | 0.001759 | 4  | ;cg05720159;cg19801705;cg25604183;cg04645331                                                                   | 0.045245 |
| 3758 | 0.034452 | 0.011031 | 0.001789 | 2  | ;cg26200585;cg01447828                                                                                         | 0.045731 |
| 1257 | 0.042296 | 0.01355  | 0.0018   | 4  | ;cg13196879;cg19382642;cg00354641;cg13436843                                                                   | 0.045731 |
| 2166 | -0.09012 | 0.028926 | 0.001836 | 2  | ;cg05971678;cg11803859                                                                                         | 0.046147 |
| 3668 | -0.0334  | 0.010723 | 0.001841 | 10 | ;cg26772540;cg25394203;cg26590664;cg21771200;cg15209566;cg02274869;cg10123421;cg10608596;cg00965023;cg24159514 | 0.046147 |
| 1295 | 0.066993 | 0.021518 | 0.00185  | 3  | ;cg04825215;cg11964823;cg12001709                                                                              | 0.046147 |
| 1999 | 0.042774 | 0.013748 | 0.001862 | 3  | ;cg00562504;cg02594677;cg24461627                                                                              | 0.046169 |
| 140  | 0.042594 | 0.013703 | 0.001881 | 6  | ;cg23989110;cg11592082;cg09230763;cg11705208;cg26038649;cg02673986                                             | 0.046333 |
| 1481 | 0.108748 | 0.03501  | 0.001895 | 2  | ;cg04386759;cg00893488                                                                                         | 0.046333 |
| 266  | 0.033849 | 0.010907 | 0.001912 | 2  | ;cg13494933;cg06872981                                                                                         | 0.046333 |
| 3445 | -0.06276 | 0.020222 | 0.001914 | 2  | ;cg09253696;cg04442638                                                                                         | 0.046333 |
| 2466 | 0.041595 | 0.013425 | 0.001946 | 7  | ;cg20587970;cg27661571;cg06953577;cg09517809;cg26945670;cg18517222;cg18935108                                  | 0.046842 |
| 566  | -0.0484  | 0.015689 | 0.002037 | 2  | ;cg13700939;cg06202737                                                                                         | 0.048737 |
| 2443 | 0.047555 | 0.01544  | 0.00207  | 2  | ;cg01202519;cg03102841                                                                                         | 0.048985 |
| 196  | -0.04751 | 0.015425 | 0.002071 | 3  | ;cg07347511;cg00950809;cg05376185                                                                              | 0.048985 |

|      |          |          |          |   |                                                                               |          |
|------|----------|----------|----------|---|-------------------------------------------------------------------------------|----------|
| 2063 | 0.039721 | 0.012904 | 0.002083 | 4 | ;cg01464748;cg24302529;cg09832911;cg26291600                                  | 0.048985 |
| 2062 | 0.055467 | 0.018033 | 0.002099 | 4 | ;cg20447730;cg01782066;cg23771956;cg04392266                                  | 0.049077 |
| 2546 | 0.037432 | 0.012181 | 0.002118 | 5 | ;cg07634645;cg17768691;cg11905611;cg19725903;cg25642234                       | 0.049114 |
| 491  | -0.03934 | 0.012805 | 0.002124 | 2 | ;cg00360761;cg00055073                                                        | 0.049114 |
| 4053 | 0.027    | 0.0088   | 0.002153 | 2 | ;cg00093544;cg02923264                                                        | 0.049483 |
| 3896 | 0.044907 | 0.014643 | 0.002164 | 7 | ;cg27413508;cg12033622;cg26070540;cg17116120;cg21543589;cg08918020;cg11704513 | 0.049483 |
| 1552 | -0.06332 | 0.020665 | 0.002184 | 2 | ;cg04682905;cg11554295                                                        | 0.049517 |
| 75   | -0.02074 | 0.00677  | 0.00219  | 2 | ;cg10055231;cg12690996                                                        | 0.049517 |
| 2918 | 0.05459  | 0.01784  | 0.002213 | 3 | ;cg09088406;cg13159361;cg07521193                                             | 0.049783 |

**Supplemental table 3:** List of robust enhancers from Andersson et al, 2014, which were located 300 bps within a DMC.

| Chromosome | start    | end      | Cluster no. | score    | Max dist. | Feature location |
|------------|----------|----------|-------------|----------|-----------|------------------|
| chr15      | 31372997 | 31373178 | 2929        | 0.072807 | 191       | overlapEnd       |
| chr2       | 2.4E+08  | 2.4E+08  | 672         | 0.130861 | 15        | inside           |
| chr2       | 8597389  | 8597923  | 451         | 0.090329 | 237       | overlapEnd       |
| chr3       | 1.96E+08 | 1.96E+08 | 857         | -0.08438 | 18        | inside           |
| chr3       | 1.96E+08 | 1.96E+08 | 861         | 0.061115 | 197       | downstream       |
